# Supplementary material for: Targeting CD73 with AB680 (Quemliclustat), a Novel and Potent Small-Molecule CD73 Inhibitor, Restores Immune Functionality and Facilitates Antitumor Immunity
Source: Oxford University Press journal article supplement (doi:10.1158/1535-7163.mct-21-0802), 2022-04-11
Supplement: mct-21-0802-sst.docx [file mct-21-0802-sst.docx]

**Supplementary Table 1. Antibodies for Flow Cytometry**

| **Reactivity** | **Antibody** | **Fluorophore** | **Clone** | **Vendor** | **Experiment** |
| --- | --- | --- | --- | --- | --- |
| Human | CD8 | BUV496 | RPA-T8 | BD | Tumors/Tumor-specific T cell assay |
| Foxp3 | AF488 | PCH101 | eBiosciences | Tumors |
| CD73 | BUV737 | AD2 | BD | Tumors |
| CD3 | BV421 | UCHT1 | BD | Tumors |
| CD4 | BUV396 | RPA-T4 | BD | Tumors |
| HLA-DR | AlexaFluor700 | G46-6 | BD | Tumors |
| HLA-DR | PE-Cy7 | G46-6 | BD | Tumors |
| CD45 | PE-Cy7 | HI30 | BD | Tumors |
| CD45 | PE | HI30 | BD | Tumors |
| CD25 | BV650 | 2A3 | BD | Tumors |
| CD25 | FITC | 2A3 | BD | Tumors |
| CD25 | APC | M-A251 | BD | Tumor-specific T cell assay |
| CD8 | PE-Cy7 | SK1 | eBiosciences | T cell activation assay |
| CD25 | APC | M-A251 | BD | T cell activation assay |
| CD4 | Alexa 700 | OKT4 | eBiosciences | Tumor-specific T cell assay |
| CD69 | PE-Cy7 | FN50 | BD | Tumor-specific T cell assay |
| Mouse | CD73 | EF450 | TY/11.8 | BD | Tumors/CTL assay |
| CD45 | BV650 | 40-F11 | BD | Tumors |
| CD8 | BUV737 | 53-6.7 | BD | Tumors |
| CD4 | AlexaFluor700 | RM4-5 | eBiosciences | Tumors |
| CD25 | BUV396 | PC6.15 | BD | Tumors |
| Foxp3 | AF488 | FJK-16s | eBiosciences | Tumors |
| CD8 | PE | 53-6.7 | BD | CTL assay |
| CD44 | BUV395 | IM7 | BD | CTL assay |
| CD25 | APC | PC6.15 | eBiosciences | CTL assay |
| CD62L | PE-Cy7 | MEL-14 | BD | CTL assay |

**Supplementary Table 2. Patient Data and Characteristics of Tumor Biopsies**

| **Patient ID** | **Cancer type** | **Stage** |
| --- | --- | --- |
| 121127316 | HNSC | Unknown (Reviewed) |
| 120811324 | HNSC | III |
| 110003074 | HNSC | III |
| 110003443 | HNSC | III |
| 110003869 | HNSC | IV-A |
| 00516MS | CRC | I |
| 12216MS | CRC | I |
| 01116MS | CRC | II-A |
| 42516MS | KIRC | I-A |
| 40616MS | KIRC | I |
| 71316MS | KIRC | I |
| 81516MS | NSCLC | I |
| 41816MS | NSCLC | I |
| 101716MS | NSCLC | II-A |
| 92016MS | Melanoma | II-C |
| 20616MS | Melanoma | II-B |
| 20116MS | Melanoma | III |
